# Supplementary material for: Masticatory musculature of the African mole-rats (Rodentia: Bathyergidae)
Source: PeerJ. 2020 Mar 24;8:e8847. doi: 10.7717/peerj.8847 (PMC7100595; doi:10.7717/peerj.8847)
Supplement: Supplemental Information 2 — Absolute masses (in g) of masticatory muscles of African mole-rats. Data for Heterocephalus from Cox & Faulkes (2014). [file peerj-08-8847-s002.xlsx]

## Sheet: Table S2
Table S2: Absolute masses (in g) of masticatory muscles of African mole-rats
	Bathyergus	Cryptomys	Fukomys	Georychus	Heliophobius	Heterocephalus
Superficial masseter	3.06826	0.471841	0.223257	0.536979	0.631284	0.0570033
Deep masseter	1.94102	0.457675	0.180317	0.471746	0.907289	0.0620001
Anterior ZM	0.221411	0.0339527	0.0177549	0.0560631	0.173577	0.00700393
Posterior ZM	0.150579	0.0563272	0.0343552	0.0743917	0.197821	0.00600035
IOZM	0.301803	0.107034	0.0397608	0.145445	0.156516	0.0130677
Temporalis	2.12801	0.612828	0.213338	0.580175	0.855959	0.0780046
Medial pterygoid	0.303176	0.147304	0.0793937	0.161978	0.236053	0.0150009
Lateral pterygoid	0.0750995	0.0379036	0.0261533	0.046714	0.12063	0.0129937
TOTAL	8.18936	1.92487	0.81433	2.07349	3.27913	0.251075
Data for Heterocephalus from Cox & Faulkes (2014)
